# Supplementary material
Source: Springer Nature journal article supplement (https://www.springermedizin.de/resource/supplementary/12963_2011_153_MOESM10_ESM.pdf/9572772)

HCE No HCE

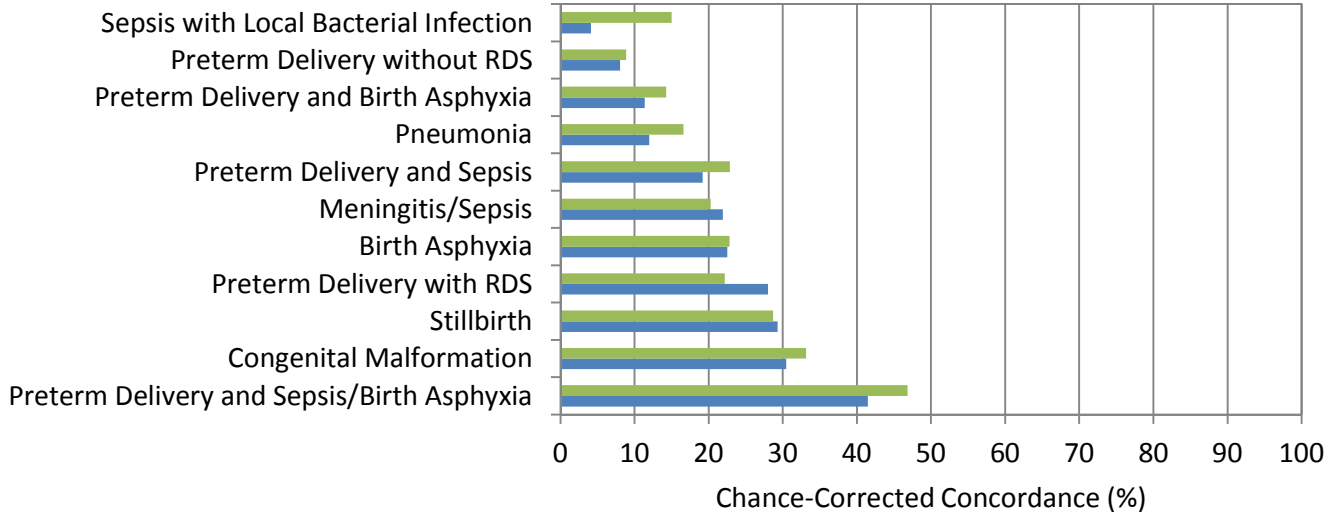

Supplement: MOESM10 [file 9572772]
